# Supplementary material
Source: PubMed Central journal article supplement (PMC2630910)

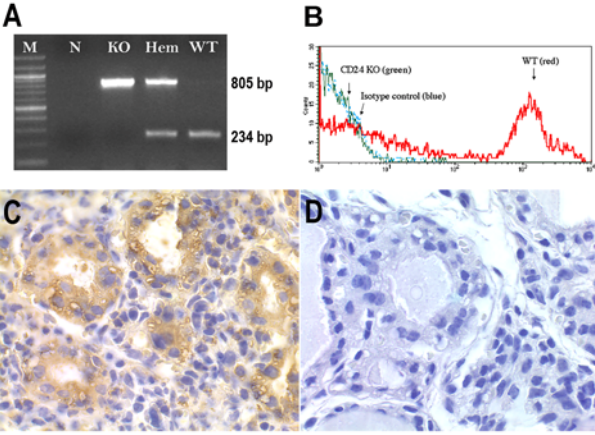

Chen *et al.* Supplement Figure 1

Supplement: en.2008-0639_1.pdf [file en.2008-0639_1.pdf]
